# Supplementary material for: Design and use of silica-containing redox nanoparticles, siRNPs, for high-performance peritoneal dialysis
Source: Royal Society of Chemistry journal article supplement (doi:10.1039/c3bm60236b), 2014-01-01
Supplement: c3bm60236b.pdf [file c3bm60236b.pdf]

*Supplemental data*

**Design and use of silica-containing redox nanoparticles,  
siRNP, for high-performance peritoneal dialysis**

Yukio Nagasaki<sup>a,b,c,\*</sup>, Tatsuya Yaguchi<sup>a</sup>, Takuma Matsumura<sup>a</sup>, Toru Yoshitomi<sup>a</sup>, Yutaka Ikeda<sup>a</sup>, Atsushi Ueda<sup>d</sup>, Aki Hirayama<sup>e</sup>

<sup>a</sup>Department of Materials Science, Graduate School of Pure and Applied Sciences, University of Tsukuba, Tennodai 1-1-1, Tsukuba, Ibaraki 305-8573, Japan

<sup>b</sup>Master's School of Medical Sciences, Graduate School of Comprehensive Human Sciences, University of Tsukuba, Tennodai 1-1-1, Tsukuba, Ibaraki 305-8573, Japan

<sup>c</sup>Satellite Laboratory, International Center for Materials Nanoarchitectonics (WPI-MANA), National Institute for Materials Science, Tennodai 1-1-1, University of Tsukuba, Tsukuba, Ibaraki 305-8573, Japan

<sup>d</sup>Tsukuba University Hospital Hitachi Medical Education and Research Center, Jyonan-chou 2-1-1 Hitachi Ibaraki 317-0077, Japan

<sup>e</sup>Center for Integrative Medicine, Tsukuba University of Technology, Kasuga 4-12-7, Tsukuba 305-8521, Japan

---

\* Corresponding author: Department of Materials Science, Graduate School of Pure and Applied Sciences, University of Tsukuba, Tennodai 1-1-1, Tsukuba, Ibaraki 305-8573, Japan. Tel./fax: +81 29 853 5749. *e-mail address*: yukio@nagalabo.jp (*Y. Nagasaki*)

**Supplemental data**

The molecular weight of PEG-b-PCMS used in this study was 8,000 (MW of PEG and PCMS were 5,000 and 3,000, respectively)

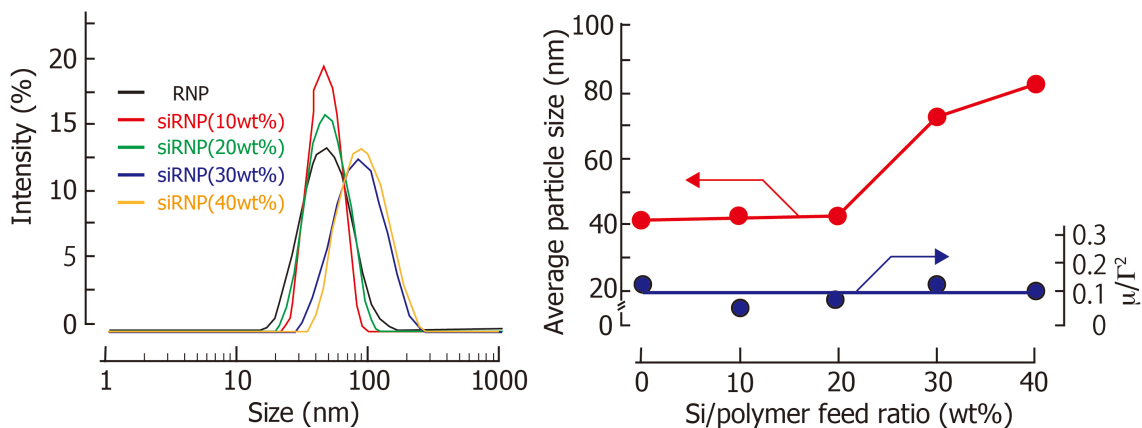

**Figure S1.** Size distributions of siRNP(2) prepared by different Si/PEG-b-PMNT feed ratio determined by dynamic light scattering (a) and its distribution data (b)

**Table S1.** Size of siRNP(1) and their Zeta potentials<sup>1</sup>

| Silica content in wt % | Average size (nm) | $\zeta$ -potential (mV) |
|------------------------|-------------------|-------------------------|
| 0                      | 22.4              | 0.62                    |
| 1                      | 38.2              | -0.11                   |
| 5                      | 41.1              | -3.4                    |
| 10                     | 47.2              | -                       |

<sup>1</sup>The same samples as in Figure 2a

**Table S2.** Silicon content and zeta-potential of siRNP(2)<sup>1</sup>

| Silica content in wt % | Average size (nm) | $\zeta$ -potential (mV) |
|------------------------|-------------------|-------------------------|
| 5                      | 1.03              |                         |
| 10                     | 2.24              |                         |
| 15                     | 3.77              |                         |
| 20                     |                   | -4.03                   |
| 30                     | 10.92             |                         |

<sup>1</sup>The same samples as in Figure S1
